# Supplementary material for: The NORAD lncRNA assembles a topoisomerase complex critical for genome stability
Source: Springer Nature journal article supplement (doi:10.1038/s41586-018-0453-z), 2018-08-24
Supplement: MOESM3 [file 41586_2018_453_MOESM3_ESM.pdf]

## Supplementary Notes

### Note S1: Proteins interacting with NORAD *in vitro*

While this paper was under review, an independent study reported an *in vitro* association between NORAD and the partially cytoplasmic protein KHDRBS1, inferred from mixing of exogenous NORAD fragments with cytoplasmic extracts<sup>1</sup>. Our quantitative RAP-MS data demonstrates that endogenous NORAD interacts strongly with the nuclear protein KHDRBS3 (a paralog of KHDRBS1) in intact cells.

### Note S2: Assessing statistical significance in RAP-MS and co-IP MS data

We have used a moderated *t*-test for determining statistical significance in RAP-MS and co-IP MS experiments. The limma library we have used for this purpose applies an empirical Bayes approach to effectively use variance shrinkage to make the test robust even with very few samples<sup>2,3</sup>. Ritchie *et al.*, 2015<sup>3</sup> demonstrate that this method is applicable to a small number of samples — in fact the example presented in their study uses two groups with two replicates each. This approach is widely used for the analysis of quantitative mass spectrometry experiments<sup>4,5</sup>.

### Note S3: Promiscuous RNA binders in RAP-MS data

Promiscuous RNA binders were defined by intersecting the results of 9 different lncRNA RAP experiments, including MALAT1, U1, CRNDE, NORAD, RMRP, PVT1, DANCR, RN7SK, RPPH1.

### Note S4: Detection of NARC1 components by size-exclusion chromatography and western blot

While we detected PRPF19 as a component of NARC1 by size-exclusion chromatography (SEC) and western blot, we did not manage to probe for the PRPF19/CDC5L complex subunit CDC5L due to a lack of high quality antibodies. With available antibodies the detection of CDC5L in cellular extracts proved challenging. At the same time, material recovered from RBMX co-IP and SEC experiments was highly limiting and did not allow comprehensive characterization of protein content beyond several key components.

## References

1. Tichon, A., Perry, R. B.-T., Stojic, L. & Ulitsky, I. SAM68 is required for regulation of Pumilio by the NORAD long noncoding RNA. *Genes & Development* **32**, 70–78 (2018).
2. Smyth, G. K. Linear models and empirical bayes methods for assessing differential expression in microarray experiments. *Stat Appl Genet Mol Biol* **3**, Article3–25 (2004).
3. Ritchie, M. E. *et al.* limma powers differential expression analyses for RNA-sequencing and microarray studies. *Nucleic Acids Research* **43**, e47–e47 (2015).
4. Huttlin, E. L. *et al.* The BioPlex Network: A Systematic Exploration of the Human Interactome. *Cell* **162**, 425–440 (2015).
5. Krönke, J. *et al.* Lenalidomide induces ubiquitination and degradation of CK1 $\alpha$  in del(5q) MDS. *Nature* **523**, 183–188 (2015).
